# Supplementary material
Source: publisher figshare collection journal article supplement (https://karger.figshare.com/ndownloader/files/7580503)
Supplement: Supplementary file 1 [file 7580503]

## Sheet: Sheet1
Table S2. Primers in this study for gene cloning and RT-qPCR
Gene Symbol	Gene Name	Gene Bank#	Primer	Sequence (5'-3')
cyp19a	Cytochrome P450 aromatase, family 19, subfamily A, polypeptide 1	EU841366	Forward	TTACTTCCAGCCATTCGGTTC
			Reverse	AGAGAGCAGAGTCACCAGGATG
cyp19b	Cytochrome P450 aromatase, family 19, subfamily B, polypeptide 1	EU252488	Forward	CAAACACCTGGACAACCTGC
			Reverse	CTGTCTGCCAGGTCTCAAAGTAG
foxl2	Forkhead box L2	KC823043	Forward	TGACAACAACACGAAGAAGGAG
			Reverse	GGCAATGAGAGCAACATAGGA
amh	Anti-Müllerian hormone	KF770790	Forward	AAGGAAGGACAGGGTTTG
			Reverse	CATCAGAGGGCAACATTTAC
vasa	Vasa (vas)-related gene, is essential for germ cell development	AY912131	Forward	ACGACGACATTACGGTGGAT
			Reverse	GACATTTCTTCTCAGGGTCTCAC
nr5a1b(sf1)	Nuclear receptor subfamily 5, group a, member 1b	KJ131498	Forward*	TGTGTCCGGTSTGYGGRGATAAAG
			Reverse*	TTGYAGYACAGGTAGTCTTCGG
			Forward	GTCTTTGAGGAAGCGGTGTC
			Reverse	TGTGCTGTGGGTAGTGGGAT
ef1α	Elongation factor-1-α	KC011266	Forward	CGCTGCTGTTTCCTTCGTCC
			Reverse	TTGCGTTCAATCTTCCATCCC
rpl17	Ribosomal protein L17	KC011267	Forward	GTTGTAGCGACGGAAAGGGAC
			Reverse	GACTAAATCATGCAAGTCGAGGG
18S rRNA	18S ribosomal RNA	EU120033	Forward	GTGGAGCGATTTGTCTGGTTA
			Reverse	CGGACATCTAAGGGCATCAC
β-actin	Beta actin cytoskeletal structural protein	AY345056	Forward	ACTTTGAGCAAGAAATGGGAACT
			Reverse	GGACTCAGGGCAACGGAAC
gapdh	Glyceraldehyde-3-phosphate dehydrogenase	FJ873738	Forward	CATGCCATCACTGCTACCCA
			Reverse	TCAGGAATGACCTTGCCCAC
Note: primers marked with asterisk(*) represent degenerate primer for isolation of partial sequence
